# Supplementary material for: Effects of the COVID-19 pandemic on maternal, newborn, and child health service coverage in Burkina Faso
Source: PubMed Central journal article supplement (PMC11658717; doi:10.7189/jogh.14.05037), 2024-12-20
Supplement: jogh-14-05037-s001.pdf [file jogh-14-05037-s001.pdf]

## Supplementary Tables

Supplementary Table S1. Study sample and interview completeness

| Results                                   | Pre-Covid Survey |       | Covid Period Survey |       |
|-------------------------------------------|------------------|-------|---------------------|-------|
|                                           | Urban            | Rural | Urban               | Rural |
| <b>Household interviews</b>               |                  |       |                     |       |
| Households selected                       | 1449             | 1466  | 1561                | 1471  |
| Households surveyed                       | 1316             | 1421  | 1496                | 1419  |
| Response rate (%)                         | 90.8             | 96.9  | 95.8                | 96.5  |
| <b>Interviews of women aged 15-49</b>     |                  |       |                     |       |
| Eligible women                            | 2132             | 2719  | 2571                | 2322  |
| Women surveyed                            | 1960             | 2540  | 2449                | 2076  |
| Response rate (%)                         | 91.9             | 93.4  | 95.3                | 89.4  |
| <b>Interviews of children 0-59 months</b> |                  |       |                     |       |
| Children eligible                         | 955              | 1914  | 1226                | 1582  |
| Children surveyed                         | 908              | 1826  | 1201                | 1477  |
| Response rate (%)                         | 95.1             | 95.4  | 98.0                | 93.4  |

Supplementary Table S2. Distribution of women who experienced any barriers in accessing antenatal care during the Covid-19 period

| Indicators                                                                                                                     | Urban      |             | Rural      |             |
|--------------------------------------------------------------------------------------------------------------------------------|------------|-------------|------------|-------------|
|                                                                                                                                | Percentage | 95% CI      | Percentage | 95% CI      |
| Proportion of women who missed or delayed antenatal care because of Covid-19                                                   | 1.1        | [0.6-1.8]   | 2.5        | [1.0-6.0]   |
| Proportion of women who experienced barriers to accessing antenatal care because of Covid-19                                   | 1.0        | [0.6-1.7]   | 1.8        | [0.7-4.3]   |
| <b>Among women who experienced barriers to accessing antenatal care, proportion of those who cited the following barriers:</b> |            |             |            |             |
| Lack of money for services                                                                                                     | 11.1       | [2.8-35.3]  | 16.7       | [8.0-31.7]  |
| No medical staff                                                                                                               | 0.0        |             | 11.2       | [2.7-35.9]  |
| Medical establishment was saturated                                                                                            | 54.5       | [30.3-76.8] | 14.3       | [4.0-40.0]  |
| Medical establishment was closed                                                                                               | 5.3        | [1.0-23.3]  | 13.2       | [3.6-38.3]  |
| Medical facility didn't have enough supplies or tests                                                                          | 18.5       | [4.9-49.9]  | 0.0        |             |
| Fear / worry of catching Covid-19                                                                                              | 8.4        | [2.3-26.6]  | 50.8       | [14.4-86.4] |
| Restrictions (stay-at-home orders) / curfew                                                                                    | 4.1        | [0.5-25.2]  | 0.0        |             |
| Lack of transport                                                                                                              | 0.0        |             | 4.4        | [1.1-16.0]  |
| Responsibilities of the service provider                                                                                       | 3.7        | [0.8-16.1]  | 2.9        | [0.5-14.7]  |
| Service provider delayed/cancelled visit                                                                                       | 6.3        | [1.4-24.2]  | 7.1        | [1.5-28.0]  |
| Other                                                                                                                          | 2.2        | [0.3-16.1]  | 7.2        | [1.3-31.5]  |
| <b>N</b>                                                                                                                       | <b>23</b>  |             | <b>33</b>  |             |

Supplementary Table S3. Distribution of women who have changed their place of birth due to Covid-19

| Change of place of birth | Urban      |             |           | Rural      |        |            |
|--------------------------|------------|-------------|-----------|------------|--------|------------|
|                          | Percentage | 95% CI      | N         | Percentage | 95% CI | N          |
| No                       | 97.1       | [85.0-99.5] | 77        | 100.0      | -      | 112        |
| Yes                      | 2.9        | [0.5-15.0]  | 2         | 0.0        | -      | 0          |
| <b>Total</b>             | <b>100</b> |             | <b>79</b> | <b>100</b> |        | <b>112</b> |

Supplementary Table S4. Distribution of women who experienced any barriers in accessing postnatal care during the Covid-19 period

| Indicators                                                                                                                    | Urban      |            | Rural      |            |
|-------------------------------------------------------------------------------------------------------------------------------|------------|------------|------------|------------|
|                                                                                                                               | Percentage | 95% CI     | Percentage | 95% CI     |
| Proportion of women who missed or delayed postnatal care because of Covid-19                                                  | 0.6        | [0.3-1.3]  | 0.9        | [0.4-1.9]  |
| Proportion of women who experienced barriers in accessing postnatal care because of Covid-19                                  | 0.1        | [0.0-0.4]  | 0.4        | [0.2-0.9]  |
| <b>Among women who experienced barriers to accessing postnatal care. proportion of those who cited the following barriers</b> |            |            |            |            |
| No medical staff                                                                                                              | 0.0        |            | 39.0       | [7.7-83.1] |
| Medical establishment was saturated                                                                                           | 32.7       | [3.5-86.6] | 0.0        |            |
| Medical establishment was closed                                                                                              | 0.0        |            | 20.7       | [4.4-60.1] |
| Medical facility didn't have enough supplies or tests                                                                         | 13.2       | [2.5-47.7] | 3.2        | [0.3-26.1] |
| Fear / worry of catching Covid-19                                                                                             | 0.0        |            | 29.4       | [7.3-69.0] |
| Restrictions (stay-at-home orders) / curfew                                                                                   | 14.8       | [0.9-76.9] | 11.3       | [1.8-47.6] |
| Lack of transport                                                                                                             | 0.0        |            | 15.4       | [2.4-57.5] |
| Service provider delayed/cancelled visit                                                                                      | 20.9       | [1.3-84.0] | 0.0        |            |
| Other                                                                                                                         | 33.1       | [4.7-83.4] | 5.5        | [0.5-40.3] |
| <b>N</b>                                                                                                                      |            | <b>5</b>   |            | <b>12</b>  |

Supplementary Table S5. Distribution of children whose routine vaccination was delayed/missed due to Covid-19

| Indicators                                                       | Urban      |             |     | Rural      |             |     |
|------------------------------------------------------------------|------------|-------------|-----|------------|-------------|-----|
|                                                                  | Percentage | 95% CI      | N   | Percentage | 95% CI      | N   |
| Children whose vaccination was delayed or missed due to Covid-19 | 6.2        | [3.2-11.7]  | 674 | 2.8        | [1.6-4.8]   | 854 |
| <b>Reasons for delayed or missed vaccination</b>                 |            |             |     |            |             |     |
| Fear of catching Covid-19                                        | 25.7       | [15.5-39.4] | 34  | 20.7       | [8.8-41.3]  | 27  |
| Disruption of health services                                    | 41.0       | [27.0-56.7] | 34  | 25.8       | [10.0-52.0] | 27  |
| Mobility restrictions                                            | 19.9       | [9.9-35.8]  | 34  | 6.4        | [0.8-37.0]  | 27  |
| Lack of transport                                                | 0.0        |             | 34  | 20.5       | [3.4-65.5]  | 27  |
| Cost/affordability                                               | 3.9        | [0.4-26.7]  | 34  | 1.4        | [0.2-10.5]  | 27  |
| No reason                                                        | 20.1       | [6.9-45.9]  | 34  | 28.6       | [11.6-54.9] | 27  |
| Other                                                            | 0.8        | [0.1-6.4]   | 34  | 0.0        |             | 27  |

Supplementary Table S6. Distribution of whose care seeking was delayed/missed due to Covid-19

| Indicators                                                                                   | Urban      |             |      | Rural      |             |      |
|----------------------------------------------------------------------------------------------|------------|-------------|------|------------|-------------|------|
|                                                                                              | Percentage | 95% CI      | N    | Percentage | 95% CI      | N    |
| Children whose health care has been delayed or missed due to Covid-19 (March/September 2020) | 2.3        | [1.4-3.8]   | 785  | 3.1        | [1.9-5.1]   | 1020 |
| Children whose health care was delayed or missed because of Covid-19 (last 2 years)          | 1.5        | [0.8-2.9]   | 1192 | 2.2        | [1.1-4.2]   | 1467 |
| <b>Reasons for delays or shortcomings in the child's health care</b>                         |            |             |      |            |             |      |
| Fear of catching Covid-19                                                                    | 43.0       | [19.7-69.8] | 23   | 58.5       | [31.9-80.9] | 44   |
| Disruption of health services                                                                | 23.4       | [8.6-49.6]  | 23   | 25.2       | [10.4-49.5] | 44   |
| Mobility restrictions                                                                        | 15.4       | [3.5-48.0]  | 23   | 11.1       | [4.2-26.3]  | 44   |
| Lack of transport                                                                            | 5.3        | [1.2-21.3]  | 23   | 7.6        | [2.0-24.8]  | 44   |
| Self-isolation due to suspicion of Covid-19                                                  | 3.2        | [0.4-22.1]  | 23   | 0.8        | [0.1-6.4]   | 44   |
| Cost/affordability                                                                           | 19.4       | [5.8-48.9]  | 23   | 5.9        | [1.2-23.6]  | 44   |
| Other                                                                                        | 0.0        |             | 23   | 5.9        | [1.7-18.5]  | 44   |
